# Supplementary material for: Development and internal validation of the Edmonton Obesity Staging System-2 Risk screening Tool (EOSS-2 Risk Tool) for weight-related health complications: a case-control study in a representative sample of Australian adults with overweight and obesity
Source: PubMed Central journal article supplement — BMJ Open. 2022 Jun 22;12(6):e061251. doi: 10.1136/bmjopen-2022-061251 (PMC9226953; doi:10.1136/bmjopen-2022-061251), 2022-06-22
Supplement: bmjopen-2022-061251supp001.pdf [file bmjopen-2022-061251supp001.pdf]

**Supplementary Material: Specific criteria and thresholds for variables used to classify each participant into one of the five EOSS categories**

| Criteria                                                         | EOSS categories and criteria |   |   |   |   |
|------------------------------------------------------------------|------------------------------|---|---|---|---|
|                                                                  | 0                            | 1 | 2 | 3 | 4 |
| <b>Fasting plasma glucose (FPG) diabetes status (mmol/L)</b>     |                              |   |   |   |   |
| <6.1                                                             | x                            |   |   |   |   |
| 6.1 - <7.0                                                       |                              | x |   |   |   |
| ≥7.0                                                             |                              |   | x |   |   |
| <b>HbA1c diabetes status (%)</b>                                 |                              |   |   |   |   |
| <6.0                                                             | x                            |   |   |   |   |
| 6.0 - <6.5                                                       |                              | x |   |   |   |
| ≥6.5                                                             |                              |   | x |   |   |
| <b>Systolic Blood Pressure (mmHg)</b>                            |                              |   |   |   |   |
| <130                                                             | x                            |   |   |   |   |
| ≥130 - 139.9                                                     |                              | x |   |   |   |
| ≥140                                                             |                              |   | x |   |   |
| <b>Diastolic Blood Pressure (mmHg)</b>                           |                              |   |   |   |   |
| <85                                                              | x                            |   |   |   |   |
| ≥85 - 89.9                                                       |                              | x |   |   |   |
| ≥90                                                              |                              |   | x |   |   |
| <b>Total Cholesterol (mmol/L)</b>                                |                              |   |   |   |   |
| <5.0                                                             | x                            |   |   |   |   |
| 5.0 - <6.0                                                       |                              | x |   |   |   |
| ≥6.0                                                             |                              |   | x |   |   |
| <b>Fasting triglycerides (mmol/L)</b>                            |                              |   |   |   |   |
| <1.5                                                             | x                            |   |   |   |   |
| 1.5 - <2.5                                                       |                              | x |   |   |   |
| ≥2.5                                                             |                              |   | x |   |   |
| <b>Fasting LDL cholesterol - ranged (mmol/L)</b>                 |                              |   |   |   |   |
| <2.5                                                             | x                            |   |   |   |   |
| 2.5 - <4.0                                                       |                              | x |   |   |   |
| ≥4.0                                                             |                              |   | x |   |   |
| <b>HDL cholesterol - ranged (mmol/L)</b>                         |                              |   |   |   |   |
| ≥1.5                                                             | x                            |   |   |   |   |
| 1.0 - <1.5                                                       |                              | x |   |   |   |
| <1.0                                                             |                              |   | x |   |   |
| <b>Alanine aminotransferase (ALT) - categories (U/L) MALES</b>   |                              |   |   |   |   |
| <30                                                              | x                            |   |   |   |   |
| 30 - <40                                                         |                              | x |   |   |   |
| ≥40                                                              |                              |   | x |   |   |
| <b>Alanine aminotransferase (ALT) - categories (U/L) FEMALES</b> |                              |   |   |   |   |
| <25                                                              | x                            |   |   |   |   |
| 25 - <35                                                         |                              | x |   |   |   |

|                                                                |   |   |   |   |   |
|----------------------------------------------------------------|---|---|---|---|---|
| ≥35                                                            |   |   | x |   |   |
| <b>Gamma glutamyl transferase (GGT) - ranged (U/L) MALES</b>   |   |   |   |   |   |
| ≤30                                                            | x |   |   |   |   |
| 30 - <50                                                       |   | x |   |   |   |
| ≥50                                                            |   |   | x |   |   |
| <b>Gamma glutamyl transferase (GGT) - ranged (U/L) FEMALES</b> |   |   |   |   |   |
| ≤20                                                            | x |   |   |   |   |
| 20 - <35                                                       |   | x |   |   |   |
| ≥35                                                            |   |   | x |   |   |
| <b>Chronic Kidney Disease (CKD) stages</b>                     |   |   |   |   |   |
| No indicators of CKD                                           | x |   |   |   |   |
| Stage 1                                                        |   | x |   |   |   |
| Stage 2                                                        |   |   | x |   |   |
| Stage 3a + 3b                                                  |   |   |   | x |   |
| Stages 4 - 5                                                   |   |   |   |   | x |
| <b>Self-reported weight related chronic diseases</b>           |   |   | x |   |   |
| Other endocrine nutritional metabolic diseases                 |   |   | x |   |   |
| Diabetes mellitus - Type 2                                     |   |   | x |   |   |
| Diabetes mellitus - Type 1                                     |   |   | x |   |   |
| Diabetes mellitus - Type unknown                               |   |   | x |   |   |
| High sugar levels in blood/urine                               |   |   | x |   |   |
| High cholesterol                                               |   |   | x |   |   |
| Gestational diabetes                                           |   |   | x |   |   |
| Anxiety related problems                                       |   |   | x |   |   |
| Depression                                                     |   |   | x |   |   |
| Other diseases of veins lymphatic vessels                      |   |   |   | x |   |
| Diseases of arteries arterioles & capillaries                  |   |   |   | x |   |
| Angina                                                         |   | x |   |   |   |
| Oedema                                                         |   |   | x |   |   |
| Other signs symptoms involving circulatory system              |   |   | x |   |   |
| Tachycardia                                                    |   |   | x |   |   |
| Other diseases of circulatory system                           |   |   | x |   |   |
| Other heart diseases                                           |   |   |   | x |   |
| Other Ischaemic heart diseases                                 |   |   |   | x |   |
| Heart attack                                                   |   |   |   | x |   |
| Heart failure                                                  |   |   |   | x |   |
| Cardiac murmurs and cardiac sounds                             |   |   | x |   |   |
| Hypertensive disease                                           |   |   | x |   |   |
| Other cerebrovascular diseases                                 |   |   | x |   |   |
| Stroke (including after effects of stroke)                     |   |   |   | x |   |
| Varicose veins                                                 |   | x |   |   |   |
| Haemorrhoids                                                   |   | x |   |   |   |
| Sciatica                                                       |   | x |   |   |   |
| Arthritis - Osteoarthritis                                     |   |   | x |   |   |

|                                                                |   |   |   |   |   |
|----------------------------------------------------------------|---|---|---|---|---|
| Gout                                                           |   |   | x |   |   |
| Back pain/problems not elsewhere classified                    |   | x |   |   |   |
| Kidney disease                                                 |   |   | x |   |   |
| Bronchitis                                                     |   |   | x |   |   |
| Emphysema                                                      |   |   | x |   |   |
| Asthma                                                         |   | x |   |   |   |
| Other diseases of the oesophagus, stomach & duodenum           |   | x |   |   |   |
| All other diseases of the digestive system                     |   | x |   |   |   |
| Diseases of the oesophagus                                     |   | x |   |   |   |
| Stomach/duodenal/gastrointestinal ulcer                        |   | x |   |   |   |
| Hernia                                                         |   | x |   |   |   |
| Gallstones                                                     |   | x |   |   |   |
| Other arthropathies                                            |   | x |   |   |   |
| Other soft tissue disorders                                    |   | x |   |   |   |
| Disc disorders                                                 |   | x |   |   |   |
| Other diseases musculoskeletal system & connective tissue      |   | x |   |   |   |
| Rheumatism                                                     |   |   | x |   |   |
| Diseases of female pelvic organs & genital tract               |   | x |   |   |   |
| Diseases of male genital organs                                |   | x |   |   |   |
| Incontinence: urine                                            |   | x |   |   |   |
| Sprains & Strains & Tears of ligament, muscle or tendon        |   | x |   |   |   |
| Injury joint, knee not elsewhere classified                    |   | x |   |   |   |
| Fluid retention (non circulatory)                              |   | x |   |   |   |
| Kessler Psychological Distress Scale-10 (K10) score categories |   |   |   |   |   |
| 10                                                             | x |   |   |   |   |
| >10 - 15                                                       |   | x |   |   |   |
| 16 - 21                                                        |   |   | x |   |   |
| 22 - 29                                                        |   |   |   | x |   |
| 30 - 50                                                        |   |   |   |   | x |
| Self-assessed health (SF-12 or other)                          |   |   |   |   |   |
| 1. Excellent                                                   | x |   |   |   |   |
| 2. Very good                                                   | x |   |   |   |   |
| 3. Good                                                        | x |   |   |   |   |
| 4. Fair                                                        |   | x |   |   |   |
| 5. Poor                                                        |   |   | x |   |   |
| Disability status                                              |   |   |   |   |   |
| 1. Has profound core activity limitation                       |   |   |   |   | x |
| 2. Has severe core activity limitation                         |   |   |   | x |   |
| 3. Has moderate core activity limitation                       |   |   | x |   |   |
| 4. Has mild core activity limitation                           |   | x |   |   |   |
| 5. Has a schooling/employment restriction only                 |   | x |   |   |   |
| 6. Has no limitation or specific restriction                   | x |   |   |   |   |
| 7. Has no disability or long-term health condition             | x |   |   |   |   |
| Bodily pain experienced in the last four weeks                 |   |   |   |   |   |

|                |   |   |   |   |   |
|----------------|---|---|---|---|---|
| 1. None        | x |   |   |   |   |
| 2. Very mild   |   | x |   |   |   |
| 3. Mild        |   | x |   |   |   |
| 4. Moderate    |   |   | x |   |   |
| 5. Severe      |   |   |   | x |   |
| 6. Very severe |   |   |   |   | x |
